# Supplementary material for: CdSSe Nano-Flowers for Ultrasensitive Raman Detection of Antibiotics
Source: MDPI journal article supplement (doi:10.3390/molecules28072980), 2023-03-27
Supplement: s1 [file s1]

Supplementary Information (SI)

# CdSSe Nano-Flowers for Ultrasensitive Raman Detection of Antibiotics

Kangkang Wang <sup>1,2</sup>, You Li <sup>1,2</sup>, Honggang Wang <sup>1,2</sup>, Ziyue Qian <sup>1,2</sup>, Xiaokai Zhu <sup>1,2</sup>, Sabir Hussain <sup>1</sup>  
and Liming Xie <sup>1,2,\*</sup>

- <sup>1</sup> CAS Key Laboratory of Standardization and Measurement for Nanotechnology, National Center for Nanoscience and Technology, Beijing 100190, China; wangkk2020@nanoctr.cn (K.W.); d202110184@xs.ustb.edu.cn (Y.L.); wanghg2020@nanoctr.cn (H.W.); qianzy2019@nanoctr.cn (Z.Q.); zhuxk2020@nanoctr.cn (X.Z.); sabirphys@yahoo.com (S.H.)
- <sup>2</sup> School of Nanoscience and Technology, University of Chinese Academy of Sciences, Beijing 100049, China

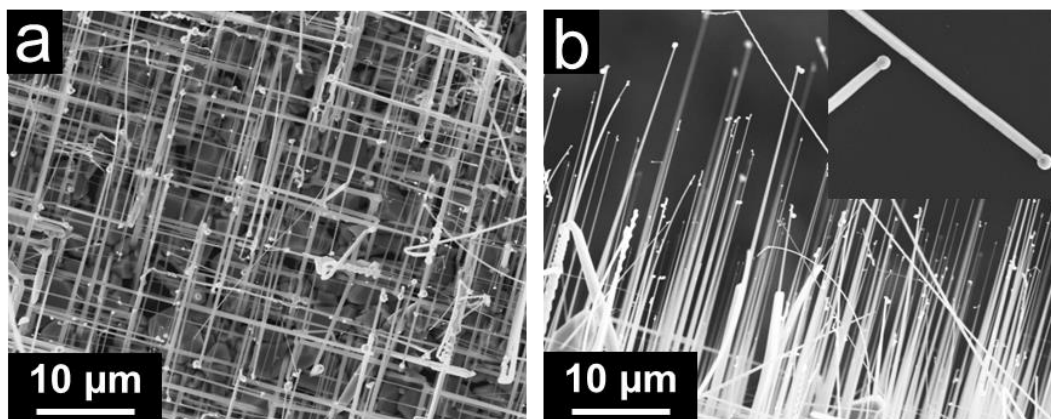

**Figure S1.** (a)–(b) SEM images of CdSSe NWs (inset of Figure S1b shows the single nanowire).

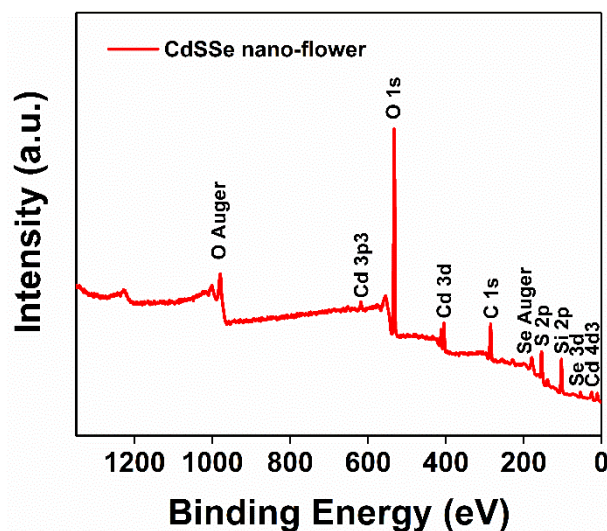

**Figure S2.** Wide-scan survey XPS spectrum of CdSSe NFs.

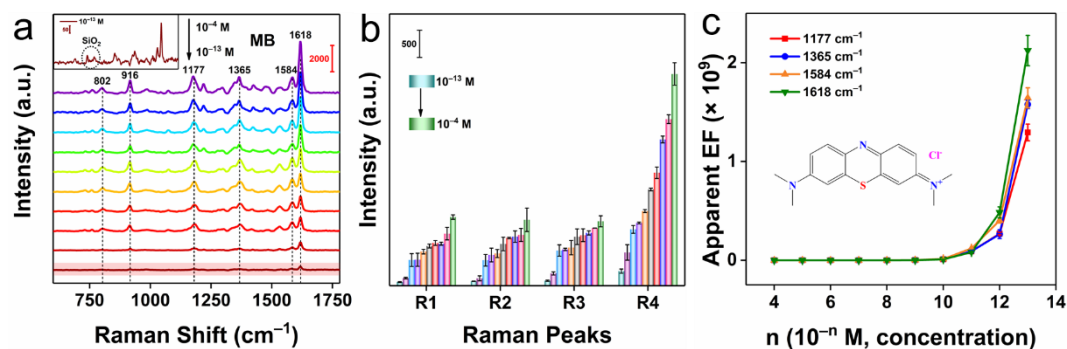

**Figure S3.** (a) SERS spectra, (b) statistical histogram of peak intensity ( $R_1$  to  $R_4$ : 1177, 1365, 1584, and 1618  $\text{cm}^{-1}$ ), and (c) apparent EF values of MB solutions at varying concentrations.

**Table S1. Apparent EFs of the Raman peaks of Rh6G and MB at different concentrations.**

| Concentration<br>(mol/L) | Rh6G (cm <sup>-1</sup> ) |                      |                      |                      | MB (cm <sup>-1</sup> ) |                      |                      |                      |
|--------------------------|--------------------------|----------------------|----------------------|----------------------|------------------------|----------------------|----------------------|----------------------|
|                          | 1184                     | 1362                 | 1573                 | 1650                 | 1177                   | 1365                 | 1584                 | 1618                 |
| <b>10<sup>-4</sup></b>   | 6.15                     | 5.34                 | 5.37                 | 5.60                 | 24.29                  | 23.60                | 21.21                | 30.78                |
| <b>10<sup>-5</sup></b>   | 45.54                    | 41.69                | 39.24                | 44.13                | 184.18                 | 175.64               | 166.15               | 242.21               |
| <b>10<sup>-6</sup></b>   | 408.21                   | 358.72               | 352.52               | 350.74               | 1.49×10 <sup>3</sup>   | 1.82×10 <sup>3</sup> | 1.61×10 <sup>3</sup> | 2.13×10 <sup>3</sup> |
| <b>10<sup>-7</sup></b>   | 3.78×10 <sup>3</sup>     | 3.35×10 <sup>3</sup> | 3.34×10 <sup>3</sup> | 3.40×10 <sup>3</sup> | 1.20×10 <sup>4</sup>   | 1.15×10 <sup>4</sup> | 1.16×10 <sup>4</sup> | 1.64×10 <sup>4</sup> |
| <b>10<sup>-8</sup></b>   | 1.17×10 <sup>4</sup>     | 9.91×10 <sup>3</sup> | 1.14×10 <sup>4</sup> | 9.42×10 <sup>3</sup> | 1.51×10 <sup>5</sup>   | 1.71×10 <sup>5</sup> | 1.90×10 <sup>5</sup> | 1.40×10 <sup>5</sup> |
| <b>10<sup>-9</sup></b>   | 1.08×10 <sup>5</sup>     | 9.25×10 <sup>4</sup> | 9.91×10 <sup>4</sup> | 8.58×10 <sup>4</sup> | 1.40×10 <sup>6</sup>   | 1.49×10 <sup>6</sup> | 1.74×10 <sup>6</sup> | 1.09×10 <sup>6</sup> |
| <b>10<sup>-10</sup></b>  | 5.87×10 <sup>5</sup>     | 5.31×10 <sup>5</sup> | 5.58×10 <sup>5</sup> | 4.19×10 <sup>5</sup> | 9.19×10 <sup>6</sup>   | 1.10×10 <sup>7</sup> | 1.25×10 <sup>7</sup> | 9.12×10 <sup>6</sup> |
| <b>10<sup>-11</sup></b>  | 6.33×10 <sup>6</sup>     | 5.21×10 <sup>6</sup> | 5.68×10 <sup>6</sup> | 4.14×10 <sup>6</sup> | 9.07×10 <sup>7</sup>   | 9.09×10 <sup>7</sup> | 1.20×10 <sup>8</sup> | 8.19×10 <sup>7</sup> |
| <b>10<sup>-12</sup></b>  | 3.30×10 <sup>7</sup>     | 2.25×10 <sup>7</sup> | 2.65×10 <sup>7</sup> | 2.17×10 <sup>7</sup> | 2.69×10 <sup>8</sup>   | 2.64×10 <sup>8</sup> | 4.03×10 <sup>8</sup> | 4.84×10 <sup>8</sup> |
| <b>10<sup>-13</sup></b>  | 5.18×10 <sup>8</sup>     | 2.59×10 <sup>8</sup> | 2.88×10 <sup>8</sup> | 1.83×10 <sup>8</sup> | 1.29×10 <sup>9</sup>   | 1.58×10 <sup>9</sup> | 1.64×10 <sup>9</sup> | 2.12×10 <sup>9</sup> |
| <b>10<sup>-14</sup></b>  | 3.62×10 <sup>9</sup>     | 1.82×10 <sup>9</sup> | 1.84×10 <sup>9</sup> | 1.79×10 <sup>9</sup> | —                      | —                    | —                    | —                    |

**Table S2. Raman intensities ( $I_{\text{Raman}}$ ) of pure Rh6G ( $10^{-3}$  M) and MB ( $10^{-3}$  M), and SERS intensities ( $I_{\text{SERS}}$ ) of some peaks of Rh6G and MB at different concentrations.**

| Intensity (a.u.)                     | Rh6G ( $\text{cm}^{-1}$ ) |          |         |          | MB ( $\text{cm}^{-1}$ ) |         |         |         |
|--------------------------------------|---------------------------|----------|---------|----------|-------------------------|---------|---------|---------|
|                                      | 1184                      | 1362     | 1573    | 1650     | 1177                    | 1365    | 1584    | 1618    |
| <b>Pure (<math>10^{-3}</math> M)</b> | 3021.97                   | 10601.48 | 7261.61 | 11081.59 | 1039.74                 | 1028.09 | 1117.89 | 2530.50 |
| <b><math>10^{-4}</math> M</b>        | 929.30                    | 2828.11  | 1948.84 | 3102.55  | 1262.64                 | 1212.89 | 1185.39 | 3894.64 |
| <b><math>10^{-5}</math> M</b>        | 688.17                    | 2209.75  | 1424.60 | 2445.41  | 957.49                  | 934.31  | 1059.75 | 3064.50 |
| <b><math>10^{-6}</math> M</b>        | 616.80                    | 1901.46  | 1279.94 | 1943.40  | 772.39                  | 902.89  | 970.84  | 2690.38 |
| <b><math>10^{-7}</math> M</b>        | 571.73                    | 1774.06  | 1211.07 | 1882.05  | 786.20                  | 878.23  | 928.67  | 2077.45 |
| <b><math>10^{-8}</math> M</b>        | 176.52                    | 525.19   | 412.88  | 522.11   | 730.23                  | 767.26  | 901.37  | 1769.48 |
| <b><math>10^{-9}</math> M</b>        | 163.57                    | 490.40   | 359.85  | 475.14   | 626.40                  | 592.01  | 700.77  | 1373.67 |
| <b><math>10^{-10}</math> M</b>       | 95.66                     | 281.48   | 202.72  | 232.21   | 477.90                  | 564.51  | 668.09  | 1154.46 |
| <b><math>10^{-11}</math> M</b>       | 88.65                     | 276.18   | 206.38  | 229.56   | 471.74                  | 467.47  | 647.75  | 1035.90 |
| <b><math>10^{-12}</math> M</b>       | 78.29                     | 137.20   | 104.41  | 119.96   | 139.59                  | 135.62  | 225.05  | 612.91  |
| <b><math>10^{-13}</math> M</b>       | 54.65                     | 119.33   | 96.33   | 101.62   | 67.27                   | 81.10   | 91.89   | 268.61  |
| <b><math>10^{-14}</math> M</b>       | 49.88                     | 96.57    | 66.96   | 99.36    | —                       | —       | —       | —       |
